# Supplementary material
Source: PubMed Central journal article supplement (PMC3706629)
Supplement: NIHMS483564-supplement-1.pdf [file NIHMS483564-supplement-1.pdf]

*Supplementary Materials*

***De novo* mutations in histone modifying genes in congenital heart disease**

|                                                                                                                                                                                                                       |       |
|-----------------------------------------------------------------------------------------------------------------------------------------------------------------------------------------------------------------------|-------|
| <b>Patient cohorts</b>                                                                                                                                                                                                | 4     |
| <b>Exome sequencing</b>                                                                                                                                                                                               | 4     |
| <b>Identification and validation of <i>de novo</i> mutations</b>                                                                                                                                                      | 4-5   |
| <b>RNA sequencing dataset and analysis</b>                                                                                                                                                                            | 5     |
| <b>Principal component analysis</b>                                                                                                                                                                                   | 6     |
| <b>Statistical analyses</b>                                                                                                                                                                                           | 6-7   |
| <b>Estimating the number of genes in which <i>de novo</i> mutations contribute to CHD</b>                                                                                                                             | 7     |
| <b>Table S1: Description of the cohorts subjected to sequencing</b>                                                                                                                                                   | 8     |
| <b>Table S2: Sequencing QA/QC for CHD and control cohorts</b>                                                                                                                                                         | 9     |
| <b>Table S3: Relationship of <i>de novo</i> Bayesian quality score vs. confirmation by Sanger sequencing</b>                                                                                                          | 10    |
| <b>Table S4: All <i>de novo</i> mutations with Bayesian quality score <math>\geq 50</math></b>                                                                                                                        | 11-16 |
| <b>Table S5: <i>De novo</i> mutations in CHD are enriched in genes that are more highly expressed in the developing heart at e14.5</b>                                                                                | 17    |
| <b>Table S6. Increased frequency of <i>de novo</i> mutations (damaging and missense at conserved positions) in CHD cases and controls stratified for gene expression in developing heart at e9.5</b>                  | 18    |
| <b>Table S7: Comparison of <i>de novo</i> mutation frequency using RNA expression data at e14.5</b>                                                                                                                   | 19    |
| <b>Table S8. <i>De novo</i> mutations in CHD probands and controls stratified for gene expression in developing heart; categorical analysis of the presence or absence of any <i>de novo</i> mutation in probands</b> | 20    |

---

|                                                                                                                                                                                                                        |    |
|------------------------------------------------------------------------------------------------------------------------------------------------------------------------------------------------------------------------|----|
| <b>Table S9: Odds ratios in different CHD classes</b>                                                                                                                                                                  | 21 |
| <b>Table S10: Chromatin modifying and other genes of interest with <i>de novo</i> mutations in CHD probands (expanded diagnosis)</b>                                                                                   | 22 |
| <b>Table S11: Genes with &gt; 1 <i>de novo</i> mutation in CHD probands</b>                                                                                                                                            | 23 |
| <b>Table S12: Candidate genes for LVO, CTD, HTX</b>                                                                                                                                                                    | 24 |
| <b>Table S13: CHD <i>De novo</i> variants that overlap with candidate genes</b>                                                                                                                                        | 25 |
| <b>Figure S1: Distribution of 8X read coverage between cases and controls</b>                                                                                                                                          | 26 |
| <b>Figure S2: Correlation of Bayesian quality score and probability of Sanger validation</b>                                                                                                                           | 27 |
| <b>Figure S3: Distribution of <i>de novo</i> mutation quality score</b>                                                                                                                                                | 28 |
| <b>Figure S4: Correlation of paternal and maternal age with <i>de novo</i> mutation rate</b>                                                                                                                           | 29 |
| <b>Figure S5: Effect of ancestry of <i>de novo</i> mutation rate</b>                                                                                                                                                   | 30 |
| <b>Figure S6: <i>De novo</i> mutation rate closely approximates Poisson distribution in CHD cases and controls</b>                                                                                                     | 31 |
| <b>Figure S7: <i>De novo</i> mutations in CHD probands and controls stratified for gene expression in developing heart; categorical analysis of the presence or absence of any <i>de novo</i> mutation in probands</b> | 32 |
| <b>Figure S8: Expression of genes mutated in cases and controls</b>                                                                                                                                                    | 33 |
| <b>Figure S9: <i>De novo</i> mutations in CHD cases and controls stratified for gene expression in adult tissues</b>                                                                                                   | 34 |

---

**Patient cohorts.** Probands with or without parents were recruited from 9 centers in the United States and the United Kingdom into the Congenital Heart Disease Genetic Network Study of the Pediatric Cardiac Genomics Consortium (CHD Genes: NCT01196182)<sup>7</sup>. The protocol was approved by the Institutional Review Boards of Boston Children's Hospital, Brigham and Women's Hospital, Great Ormond St. Hospital, Children's Hospital of Los Angeles, Children's Hospital of Philadelphia, Columbia University Medical Center, Icahn School of Medicine and Mt. Sinai, Rochester School of Medicine and Dentistry, Steven and Alexandra Cohen Children's Medical Center of New York, and Yale School of Medicine. Written informed consent was obtained from each participating subject or their parent/guardian. Probands were selected for severe congenital heart disease (excluding isolated VSDs, ASDs, PDAs or PSs), availability of both parents, and absence of any CHD in first-degree relatives. Cardiac diagnoses were obtained from review of echocardiogram, catheterization and operative reports; extracardiac findings were extracted from medical records. Controls were from 264 previously studied quartets that included one offspring with autism, an unaffected sibling and unaffected parents, all recruited with written informed consent by the Simons Foundation Autism Research Initiative<sup>28</sup>. Parents and their unaffected sibling from this cohort were analyzed in the current study.

**Exome sequencing.** Trios were sequenced at the Yale Center for Genome Analysis following the same protocol. Genomic DNA from venous blood was captured with the NimbleGen v2.0 exome capture reagent (Roche) and sequenced (Illumina HiSeq 2000, 75 base paired-end reads). Reads were mapped to the reference genome using Eland. SNV and indel calls were assigned quality scores (QS) using SAMtools<sup>8</sup> and annotated for novelty using dbSNP, build 135, 1000 genomes, May 2011 release and the Yale Exome Database, for impact on encoded proteins, and conservation of variant position.

**Identification and confirmation of *de novo* mutations.** Heterozygous SNVs and indels in the proband that showed QS  $\geq$  60 and 600, respectively, and rare

non-reference calls in both parents were selected. Read plots of all putative indels were visually inspected in trio members to eliminate false calls. A Bayesian algorithm was used to assist *de novo* mutation calls. Elements included probability of the proband being heterozygous at the test position; probability that parents are homozygous for the reference allele, given frequency of reference and non-reference reads and probability of heterozygosity in offspring; probability that a variant is *de novo* given its population frequency. Resulting QSs scaled from 0 to 100. Their correlation with bona fide *de novo* mutations was determined by Sanger sequencing of PCR amplicons harboring 181 putative mutations distributed across the QS spectrum. Additionally, all six *de novo* indels with QS > 50 in the HHE gene set were tested and confirmed by Sanger sequencing.

**RNA sequencing and analysis.** Hearts from e14.5 mouse embryos (strain 129SvEv) were isolated, rinsed, and immersed in RNALater. Left and right atria, left ventricle (with interventricular septum, aortic and mitral valves), and right ventricle (with pulmonary and tricuspid valves) were dissected. Chamber-specific RNAs were extracted and pooled from 5 embryos, selected with oligo-dT, copied into double stranded DNA, and ligated to adaptors. 150-250 bp fragments were isolated after acrylamide gel electrophoresis, amplified and sequenced (Illumina HiSeq2000), with > 40 million paired-end 50 base reads per library as previously described<sup>29</sup>. Reads were aligned to the mouse genome (mm9)<sup>30</sup>, and reads per gene per million mapped reads (rpm) was determined. The average of rpm of each gene from each chamber was used as the measure of heart expression. RNA from atria, ventricle and truncus/outflow tract at e9.5 was prepared, sequenced and analyzed by an analogous approach. RNA sequencing of control human adult tissues- lung, liver, heart and brain- from the Illumina Human Body Map (<http://www.ebi.ac.uk/arrayexpress/browse.html?keywords=E-MTAB-513>) was similarly performed and analyzed as reads per gene per million reads per kb of transcript.

**Principal component analysis.** The EIGENSTRAT program was used to compare SNP genotypes of probands and individuals of known ancestry in HapMap3 (<http://hapmap.ncbi.nlm.nih.gov/>). SNPs with MAF >5% without significant linkage disequilibrium with other SNPs were analyzed. The results of analysis correctly distinguished ancestry groups in HapMap3 samples; ancestries of CHD subjects were assigned accordingly.

**Statistical analyses.** The significance of mutation frequency differences between groups was tested with two-tailed binomial exact tests; two-tailed Fisher exact tests assessed differences in numbers of patients with one or more *de novo* mutations; tests among 3 groups was by Chi-square analysis. Gene expression at e14.5 of genes mutated in cases and controls was compared by Wilcoxon signed-rank test. Correlation of mutation rate and parental age was tested by Pearson's correlation. The expected number of genes with more than one *de novo* mutation was determined by Monte Carlo simulation ( $10^8$  iterations) specifying the total number of protein-altering mutations and 21,000 genes of observed coding length. Analogous approaches were used to determine probabilities of any gene having  $\geq 2$  damaging mutations,  $\geq 1$  damaging and  $\geq 1$  mutation at a conserved position, and  $\geq 13$  genes mutated in both CHD and autism. The fit to the Poisson distribution of the observed numbers of *de novo* mutations per subject was assessed by Chi-square test.

Overrepresentation of *de novo* mutations in the H3K4me pathway and the presence of significant enrichment of other gene pathways was tested via Gene Ontology (GO) analysis, using a modified Fisher's exact test with Bonferroni correction as implemented in DAVID (<http://david.abcc.ncifcrf.gov/>). Input was all genes with protein-altering *de novo* mutations in CHD or control subjects, and all genes sequenced. The H3K4me gene set was: *CHD8, MLL3, SETD7, WHSC1L1, CDC73, WHSC1, SETD1A, MLL2, KDM5A, MLL4, MLL5, UBE2B, ASH1L, SETD1B, MLL, LEO1, PAF1, KDM5C, CTR9, PRDM9, MEN1, CHD7, RNF20, KDM1A, RNF40, SMYD3, KDM6A, KDM5B, USP44, WDR5*. The

expected number of mutations in the H3K4me set was calculated from the fraction of the exome coding region attributable to this gene set and the total number of *de novo* mutations.

**Estimating number of genes in which *de novo* mutations contribute to CHD.** We addressed this question using the ‘unseen species problem’<sup>9</sup>. We infer that the number of probands with non-synonymous mutations in the HHE set (81) minus the expected number (44; calculated from the number observed in controls), represents the number of subjects in whom *de novo* mutations confer CHD risk (37; 10.0% of probands). The number of genes with > 1 protein-altering *de novo* mutation (six) minus the most likely number expected by chance (three) represents risk-associated genes with more than 1 mutation (three). The number of risk-associated genes (C) is estimated as follows:

$$C = c/u + g^2 \times d \times (1-u)/u$$

c = number of observed risk-associated genes (34)

c<sub>1</sub> = number of genes mutated once (31)

d = total number of risk-associated mutations (37)

g = variation in effect size of individual *de novo* mutations (assumed to be 1, which minimizes underestimation of set size)

u = 1 – c<sub>1</sub>/d (probability that newly added mutation hits a previously mutated gene)

$$C = 401$$

From 95% confidence intervals of the number of risk-associated events, the 95% confidence interval for number of risk genes is calculated as 197-837.

**Table S1. Description of cohorts subjected to sequencing**

| Demographics                                          | Cases (362) <sup>†</sup> | Controls (264) |
|-------------------------------------------------------|--------------------------|----------------|
| Male: Female                                          | 220:142                  | 163:161        |
| Age at enrollment ( <i>mean ± SD</i> )                | 7.8 ± 9.6                | 13.7 ± 4.6     |
| Maternal age at birth of proband ( <i>mean ± SD</i> ) | 31.2 ± 5.5               | 29.9±4.8       |
| Paternal age at birth of proband ( <i>mean ± SD</i> ) | 31.9 ± 6.1               | 32.5±6         |
| African-American                                      | 32 (8.8%)                | 9 (3.8%)       |
| European                                              | 305 (84.3%)              | 187 (79.2%)    |
| Asian                                                 | 31 (8.6%)                | 13 (5.5%)      |
| Native American                                       | 4 (1.1%)                 | 0 (0%)         |
| Hispanic                                              | 50 (13.8%)               | 27 (11.5%)     |
| <b>Cardiac Lesions in Probands<sup>§</sup></b>        |                          |                |
| Conotruncal Defects (CTD): 153 probands               |                          |                |
| TOF                                                   | 63 (17%)                 |                |
| TOF/PA                                                | 9 (2.5%)                 |                |
| TOF/PA-MAPCA                                          | 12 (3%)                  |                |
| D-TGA                                                 | 47 (13%)                 |                |
| DORV                                                  | 18 (5%)                  |                |
| TA                                                    | 7 (2%)                   |                |
| AoAA                                                  | 3 (1%)                   |                |
| Left Ventricular Obstruction (LVO): 132 probands      |                          |                |
| HLHS                                                  | 60 (17%)                 |                |
| CoA                                                   | 36 (10%)                 |                |
| BAV                                                   | 40 (11%)                 |                |
| AS (not BAV)                                          | 13 (4%)                  |                |
| MS                                                    | 1 (0.3%)                 |                |
| Heterotaxy (HTX): 70 probands                         |                          |                |
| RAI                                                   | 8 (2%)                   |                |
| LAI                                                   | 16 (4%)                  |                |
| DEX                                                   | 19 (5%)                  |                |
| CAVC                                                  | 26 (7%)                  |                |
| DORV                                                  | 17 (5%)                  |                |
| L-Loop                                                | 12 (3%)                  |                |
| L-TGA                                                 | 18 (5%)                  |                |
| Other Cardiac Diagnosis: 6 probands                   |                          |                |
| TAPVR                                                 | 1 (0.3%)                 |                |
| CAVC                                                  | 1 (0.3%)                 |                |
| DILV                                                  | 3 (1%)                   |                |
| other                                                 | 1 (0.3%)                 |                |
| Extracardiac abnormalities                            | 81 probands (22%)        |                |

<sup>†</sup>Self-reported ethnicity: 15 probands self-identified as multi-ethnic, hence ethnicities total >100%

<sup>§</sup>Numerous probands have more than one cardiac feature; for this reason, sum of sub-phenotypic classification does not equal 100%.

Abbreviations: TOF-tetralogy of Fallot; TOF/PA-tetralogy of Fallot with pulmonary atresia; TOF/PA-MAPCA-tetralogy of Fallot with pulmonary atresia and multiple aortico-pulmonary collaterals; D-TGA-D-transposition of the great arteries; DORV-double outlet right ventricle; AoAA-aortic arch anomaly; TA-truncus arteriosus; HLHS-hypoplastic left heart syndrome; CoA-coarctation of the aorta; BAV-bicuspid aortic valve; AS-aortic stenosis; MS-mitral stenosis; RAI-right atrial isomerism; LAI-left atrial isomerism; Dex-dextrocardia; CAVC-complete atrioventricular canal; L-Loop-L-looped ventricles; L-TGA-L-Transposition of the great arteries; TAPVR-total anomalous pulmonary venous return; DILV-double-inlet left ventricle.



**Table S2: Sequencing QA/QC for CHD and control cohorts**

| Category                                  | Cases<br>(1086 samples) | Controls<br>(792 samples) |
|-------------------------------------------|-------------------------|---------------------------|
| Read length (bp)                          | 74                      | 74                        |
| # of reads per sample (M)                 | 102.6 ± 28              | 120 ± 45.5                |
| Median coverage at each targeted base (X) | 91.2 ± 23.9             | 99.3 ± 36.6               |
| Mean coverage at each targeted base (X)   | 107 ± 27.7              | 117.1 ± 42                |
| % of all bases that map to human genome   | 91.3% ± 0.9             | 91.3% ± 2                 |
| % of all bases that map to target         | 69.1% ± 4.8             | 67.4% ± 9.3               |
| % of targeted bases read at least 8x      | 96.0% ± 1               | 95.6% ± 1.6               |
| % of targeted bases read at least 20x     | 91.4% ± 3.4             | 90.5% ± 6.8               |
| Mean error rate                           | 0.5% ± 0.1              | 0.6% ± 0.2                |
| % PCR duplicates                          | 5.53% ± 2.39            | 5.39% ± 2.79              |

**Table S3. Relationship of *de novo* Bayesian quality score vs. confirmation by Sanger sequencing**

| Bayesian Quality Score | # of putative <i>de novo</i> mutations | # of attempted confirmations | # validated by Sanger sequencing | % of all <i>de novo</i> mutations |
|------------------------|----------------------------------------|------------------------------|----------------------------------|-----------------------------------|
| ≥50                    | 324                                    | 88                           | 88 (100%)                        | 88.5%                             |
| 40-50                  | 9                                      | 9                            | 7 (77%)                          | 1.9%                              |
| 30-40                  | 11                                     | 11                           | 8 (72%)                          | 2.2%                              |
| 20-30                  | 34                                     | 31                           | 13 (42 )                         | 3.9%                              |
| 10-20                  | 64                                     | 15                           | 3 (20%)                          | 3.5%                              |
| 5-10                   | 77                                     | 5                            | 0 (0%)                           | 0%                                |















**Table S5. *De novo* mutations (damaging and missense at conserved positions) in CHD are enriched in genes that are more highly expressed in the developing heart at e14.5**

| % of all genes | $\geq n$ reads per million @ e14.5 | # genes | Total # <i>de novo</i> mutations |           | <i>De novo</i> mutations/subject |           | Odds Ratios Cases: Cont (95% CI) <sup>†</sup> | P-value <sup>††</sup> |
|----------------|------------------------------------|---------|----------------------------------|-----------|----------------------------------|-----------|-----------------------------------------------|-----------------------|
|                |                                    |         | CHD                              | Controls  | CHD                              | Controls  |                                               |                       |
|                |                                    |         | 362 trios                        | 264 trios | 362 trios                        | 264 trios |                                               |                       |
| 100%           | 0                                  | 16,676  | 101                              | 63        | 0.279                            | 0.239     | 1.48 (0.9-2.4)                                | 0.34                  |
| 50%            | 13                                 | 8,338   | 73                               | 36        | 0.202                            | 0.136     | 1.97 (1.1-3.6)                                | 0.06                  |
| 45%            | 17                                 | 7,504   | 71                               | 30        | 0.196                            | 0.114     | 2.16 (1.1-4.1)                                | 0.01                  |
| 40%            | 21                                 | 6,670   | 67                               | 28        | 0.185                            | 0.106     | 2.03 (1.0-4.0)                                | 0.01                  |
| 35%            | 26                                 | 5,837   | 63                               | 24        | 0.174                            | 0.091     | 2.35 (1.2-4.8)                                | 0.006                 |
| 30%            | 32                                 | 5,003   | 61                               | 18        | 0.169                            | 0.068     | 3.54 (1.6-7.7)                                | 0.0004                |
| 25%            | 40                                 | 4,169   | 54                               | 15        | 0.149                            | 0.057     | 3.60 (1.6-8.3)                                | 0.0005                |
| 20%            | 50                                 | 3,335   | 48                               | 11        | 0.133                            | 0.042     | 5.13 (2.0-12.9)                               | 0.0002                |
| 15%            | 66                                 | 2,501   | 37                               | 10        | 0.102                            | 0.038     | 4.84 (1.8-13.2)                               | 0.004                 |
| 10%            | 93                                 | 1,668   | 24                               | 6         | 0.066                            | 0.023     | 4.73 (1.4-15.7)                               | 0.02                  |
| 5%             | 161                                | 834     | 12                               | 2         | 0.033                            | 0.008     | 5.00 (0.7-33.8)                               | 0.05                  |

<sup>†</sup>The odds ratio is the ratio of protein-altering to silent variants in cases divided by the corresponding ratio in controls

<sup>††</sup>P-values compare the number of variants in each category between cases and controls using a two-tailed binomial exact test

Genes were ranked for level of expression in heart at e14.5, and partitioned at successive percentiles (e.g. '25%' denotes the genes in the top quartile of expression). Genes in resulting groups were analyzed for burden of damaging or missense mutations at conserved positions in CHD cases and controls.

**Table S6. Increased frequency of *de novo* mutations (damaging and missense at conserved positions) in CHD cases and controls stratified for gene expression in developing heart at e9.5**

| <b>Cases vs. controls, High heart expressed genes at e9.5 (top 25%)</b> | Total # of <i>de novo</i> mutations |                    | <i>De novo</i> mutations/subject |                    | Odds Ratio Cases:Cont (95% CI) <sup>†</sup> | P-value <sup>††</sup> |
|-------------------------------------------------------------------------|-------------------------------------|--------------------|----------------------------------|--------------------|---------------------------------------------|-----------------------|
|                                                                         | CHD 362 trios                       | Controls 264 trios | CHD 362 trios                    | Controls 264 trios |                                             |                       |
| Silent                                                                  | 18                                  | 23                 | 0.050                            | 0.087              | 1.00 (0.42 - 2.39)                          | 0.08                  |
| Nonconserved Missense                                                   | 29                                  | 21                 | 0.080                            | 0.080              | 1.76 (0.77 - 4.06)                          | 1.00                  |
| Silent and Protein Changing                                             | 93                                  | 58                 | 0.257                            | 0.220              | 2.05 (1.02 - 4.12)                          | 0.37                  |
| All Protein Changing                                                    | 75                                  | 35                 | 0.207                            | 0.133              | 2.74 (1.31 - 5.71)                          | 0.03                  |
| Conserved Missense                                                      | 32                                  | 12                 | 0.088                            | 0.045              | 3.41 (1.38 - 8.43)                          | 0.05                  |
| Conserved and Damaging Protein Altering                                 | 46                                  | 14                 | 0.127                            | 0.053              | 4.20 (1.78 - 9.91)                          | 0.004                 |
| Damaging                                                                | 14                                  | 2                  | 0.039                            | 0.008              | 8.94 (1.80 - 44.52)                         | 0.02                  |

<sup>†</sup>The odds ratio is the ratio of protein-altering to silent variants in cases divided by the corresponding ratio in controls

<sup>††</sup>P-values compare the number of variants in each category between cases and controls using a two-tailed binomial exact test

**Table S7. Comparisons of *de novo* mutation frequencies using RNA expression data at e14.5**

| <b>a. Cases vs. controls,<br/>Low heart expressed<br/>genes (bottom 75%)</b> | Total # of <i>de novo</i> mutations |                           | <i>De novo</i> mutations/subject |                           | Odds Ratio<br>Cases:Cont<br>(95% CI) <sup>†</sup> | P-value <sup>††</sup> |
|------------------------------------------------------------------------------|-------------------------------------|---------------------------|----------------------------------|---------------------------|---------------------------------------------------|-----------------------|
|                                                                              | CHD<br>362 trios                    | Controls<br>264 trios     | CHD<br>362 trios                 | Controls<br>264 trios     |                                                   |                       |
| Silent                                                                       | 44                                  | 39                        | 0.12                             | 0.15                      | 1.00 (0.54-1.84)                                  | 0.38                  |
| Nonconserved Missense                                                        | 103                                 | 70                        | 0.28                             | 0.27                      | 1.30 (0.77-2.21)                                  | 0.70                  |
| Silent and Protein Changing                                                  | 194                                 | 157                       | 0.54                             | 0.59                      | 1.10 (0.68-1.77)                                  | 0.33                  |
| All Protein Changing                                                         | 150                                 | 118                       | 0.41                             | 0.45                      | 1.13 (0.69-1.85)                                  | 0.54                  |
| Conserved Missense                                                           | 37                                  | 33                        | 0.10                             | 0.13                      | 0.99 (0.53-1.88)                                  | 0.40                  |
| Conserved and Damaging<br>Protein Altering                                   | 47                                  | 48                        | 0.13                             | 0.18                      | 0.87 (0.48-1.56)                                  | 0.12                  |
| Damaging                                                                     | 10                                  | 15                        | 0.03                             | 0.06                      | 0.59 (0.24-1.47)                                  | 0.10                  |
| <b>b. High vs. Low heart-<br/>expressed genes in CHD<br/>cases</b>           | Total # of <i>de novo</i> mutations |                           | <i>De novo</i> mutations/subject |                           | Odds Ratio<br>High:Low<br>(95% CI) <sup>†</sup>   | P-value <sup>††</sup> |
|                                                                              | High heart<br>4,169 genes           | Low heart<br>12,507 genes | High heart<br>4,169 genes        | Low heart<br>12,507 genes |                                                   |                       |
| Silent                                                                       | 21                                  | 44                        | 0.06                             | 0.12                      | 1.00 (0.48-2.09)                                  | 0.59                  |
| Nonconserved Missense                                                        | 27                                  | 103                       | 0.07                             | 0.28                      | 0.55 (0.28-1.07)                                  | 0.04                  |
| Silent and Protein Changing                                                  | 102                                 | 194                       | 0.28                             | 0.54                      | 1.10 (0.62-1.95)                                  | 0.05                  |
| All Protein Changing                                                         | 81                                  | 150                       | 0.22                             | 0.41                      | 1.13 (0.63-2.03)                                  | 0.05                  |
| Conserved Missense                                                           | 39                                  | 37                        | 0.11                             | 0.1                       | 2.21 (1.11-4.39)                                  | 6.40E-05              |
| Conserved and Damaging<br>Protein Altering                                   | 55                                  | 47                        | 0.15                             | 0.13                      | 2.45 (1.28-4.69)                                  | 1.63E-07              |
| Damaging                                                                     | 15                                  | 10                        | 0.04                             | 0.03                      | 3.14 (1.21-8.16)                                  | 0.001                 |
| <b>c. High vs. Low heart-<br/>expressed genes in<br/>Controls</b>            | Total # of <i>de novo</i> mutations |                           | <i>De novo</i> mutations/subject |                           | Odds Ratio<br>High:Low<br>(95% CI) <sup>†</sup>   | P-value <sup>††</sup> |
|                                                                              | High heart<br>4,169 genes           | Low heart<br>12,507 genes | High heart<br>4,169 genes        | Low heart<br>12,507 genes |                                                   |                       |
| Silent                                                                       | 21                                  | 39                        | 0.08                             | 0.15                      | 1.00 (0.47-2.12)                                  | 0.32                  |
| Nonconserved Missense                                                        | 17                                  | 70                        | 0.06                             | 0.27                      | 0.45 (0.21-0.95)                                  | 0.06                  |
| Silent and Protein Changing                                                  | 53                                  | 157                       | 0.20                             | 0.59                      | 0.63 (0.34-1.16)                                  | 0.25                  |
| All Protein Changing                                                         | 32                                  | 118                       | 0.12                             | 0.45                      | 0.50 (0.26-0.97)                                  | 0.04                  |
| Conserved Missense                                                           | 13                                  | 33                        | 0.05                             | 0.13                      | 0.73 (0.32-1.68)                                  | 1.00                  |
| Conserved and Damaging<br>Protein Altering                                   | 15                                  | 48                        | 0.06                             | 0.18                      | 0.58 (0.26-1.27)                                  | 0.41                  |
| Damaging                                                                     | 2                                   | 15                        | 0.01                             | 0.06                      | 0.25 (0.05-1.19)                                  | 0.18                  |

<sup>†</sup> The odds ratio is the ratio of protein-altering to silent variants in high-heart genes divided by the corresponding ratio in low-heart genes for cases (a) or controls (b)

<sup>††</sup> P-values compare the number of bases in each category between high-heart expressed genes and low-heart expressed genes using a two-tailed binomial exact test

**Table S8. *De novo* mutations in CHD probands and controls stratified for gene expression in developing heart at e14.5; categorical analysis of the presence or absence of any *de novo* mutation in probands**

| <b>a. Cases vs. controls, High heart expressed genes (top 25%)</b>   | Total # of subjects with $\geq 1$ <i>de novo</i> mutations |              | Fraction of subjects with $\geq 1$ <i>de novo</i> mutation |              | Odds Ratio Cases:Cont (95% CI) | P-value               |
|----------------------------------------------------------------------|------------------------------------------------------------|--------------|------------------------------------------------------------|--------------|--------------------------------|-----------------------|
|                                                                      | CHD                                                        | Controls     | CHD                                                        | Contr Is     |                                |                       |
|                                                                      | 362 trios                                                  | 264 trios    | 362 trios                                                  | 264 trios    |                                |                       |
| Silent                                                               | 20                                                         | 21           | 0.052                                                      | 0.080        | 0.68 (0.34-1.35)               | 0.25                  |
| Nonconserved Missense                                                | 27                                                         | 17           | 0.075                                                      | 0.064        | 1.17 (0.6-2.34)                | 0.75                  |
| Silent and Protein Changing                                          | 86                                                         | 49           | 0.238                                                      | 0.186        | 1.37 (0.91-2.07)               | 0.14                  |
| All Protein Changing                                                 | 77                                                         | 31           | 0.213                                                      | 0.117        | 2.03 (1.27-3.3)                | 0.002                 |
| Conserved Missense                                                   | 38                                                         | 13           | 0.105                                                      | 0.049        | 2.26 (1.15-4.73)               | 0.01                  |
| Conserved and Damaging Protein Altering                              | 51                                                         | 15           | 0.141                                                      | 0.057        | 2.72 (1.46-5.33)               | 0.0006                |
| Damaging                                                             | 14                                                         | 2            | 0.039                                                      | 0.008        | 5.26 (1.19-48.08)              | 0.02                  |
| <b>b. Cases vs. controls, Low heart expressed genes (bottom 75%)</b> | Total # of subjects with $\geq 1$ <i>de novo</i> mutations |              | Fraction of subjects with $\geq 1$ <i>de novo</i> mutation |              | Odds Ratio Cases:Cont (95% CI) | P-value               |
|                                                                      | CHD                                                        | Controls     | CHD                                                        | Controls     |                                |                       |
|                                                                      | 362 trios                                                  | 264 trios    | 362 trios                                                  | 264 trios    |                                |                       |
| Silent                                                               | 43                                                         | 34           | 0.119                                                      | 0.129        | 0.91 (0.55-1.52)               | 0.71                  |
| Nonconserved Missense                                                | 85                                                         | 61           | 0.235                                                      | 0.231        | 1.02 (0.69-1.52)               | 0.92                  |
| Silent and Protein Changing                                          | 150                                                        | 115          | 0.414                                                      | 0.436        | 0.92 (0.66-1.28)               | 0.62                  |
| All Protein Changing                                                 | 122                                                        | 94           | 0.337                                                      | 0.356        | 0.92 (0.65-1.3)                | 0.67                  |
| Conserved Missense                                                   | 35                                                         | 32           | 0.097                                                      | 0.121        | 0.78 (0.45-1.34)               | 0.36                  |
| Conserved and Damaging Protein Altering                              | 44                                                         | 46           | 0.122                                                      | 0.174        | 0.66 (0.41-1.05)               | 0.07                  |
| Damaging                                                             | 10                                                         | 15           | 0.028                                                      | 0.057        | 0.47 (0.19-1.14)               | 0.10                  |
| <b>c. High vs. Low heart-expressed genes, CHD cases</b>              | Total # of subjects with $\geq 1$ <i>de novo</i> mutations |              | Fraction of subjects with $\geq 1$ <i>de novo</i> mutation |              | Odds Ratio High:Low (95% CI)   | P-value               |
|                                                                      | High heart                                                 | Low heart    | High heart                                                 | Low heart    |                                |                       |
|                                                                      | 4,169 genes                                                | 12,507 genes | 4,169 genes                                                | 12,507 genes |                                |                       |
| Silent                                                               | 20                                                         | 43           | 0.052                                                      | 0.163        | 1.13 (0.63-1.97)               | 0.68                  |
| Nonconserved Missense                                                | 27                                                         | 85           | 0.075                                                      | 0.322        | 0.77 (0.48-1.21)               | 0.30                  |
| Silent and Protein Changing                                          | 86                                                         | 150          | 0.238                                                      | 0.568        | 1.40 (1.06-1.83)               | 0.02                  |
| All Protein Changing                                                 | 77                                                         | 122          | 0.213                                                      | 0.462        | 1.54 (1.14-2.06)               | 0.004                 |
| Conserved Missense                                                   | 38                                                         | 35           | 0.105                                                      | 0.133        | 2.65 (1.63-4.31)               | 4.51 $\times 10^{-5}$ |
| Conserved and Damaging Protein Altering                              | 51                                                         | 44           | 0.141                                                      | 0.167        | 2.83 (1.85-4.33)               | 6.33 $\times 10^{-7}$ |
| Damaging                                                             | 14                                                         | 10           | 0.039                                                      | 0.038        | 3.41 (1.41-8.59)               | 0.003                 |
| <b>d. High vs. Low heart-expressed genes, Controls</b>               | Total # of subjects with $\geq 1$ <i>de novo</i> mutations |              | Fraction of subjects with $\geq 1$ <i>de novo</i> mutation |              | Odds Ratio High:Low (95% CI)   | P-value               |
|                                                                      | High heart                                                 | Low heart    | High heart                                                 | Low heart    |                                |                       |
|                                                                      | 4,169 genes                                                | 12,507 genes | 4,169 genes                                                | 12,507 genes |                                |                       |
| Silent                                                               | 21                                                         | 34           | 0.058                                                      | 0.129        | 1.51 (0.83-2.67)               | 0.14                  |
| Nonconserved Missense                                                | 17                                                         | 61           | 0.047                                                      | 0.231        | 0.68 (0.37-1.18)               | 0.17                  |
| Silent and Protein Changing                                          | 49                                                         | 115          | 0.135                                                      | 0.436        | 1.04 (0.73-1.46)               | 0.86                  |
| All Protein Changing                                                 | 31                                                         | 94           | 0.086                                                      | 0.356        | 0.80 (0.52-1.22)               | 0.33                  |
| Conserved Missense                                                   | 13                                                         | 32           | 0.036                                                      | 0.121        | 0.99 (0.48-1.94)               | 1.00                  |
| Conserved and Damaging Protein Altering                              | 15                                                         | 46           | 0.041                                                      | 0.174        | 0.79 (0.41-1.45)               | 0.48                  |
| Damaging                                                             | 2                                                          | 15           | 0.006                                                      | 0.057        | 0.33 (0.04-1.4)                | 0.18                  |

The odds ratio is calculated from the ratio of cases with and without *de novo* mutations in each category in cases divided by the corresponding ratio in controls. The *P*-values compares the number of subjects with and without variants in a specific category between cases and controls using a two-tailed Fisher exact test

**Table S9. Odds ratios in different disease classes**

| <b>a. Cases vs. controls,<br/>High heart expressed<br/>genes (top 25%)</b> | Total # of <i>de novo</i> mutations |              |             |              | <i>De novo</i> mutations/subject |              |             |              | Odds Ratio (95% CI) <sup>†</sup> |                       |                      |
|----------------------------------------------------------------------------|-------------------------------------|--------------|-------------|--------------|----------------------------------|--------------|-------------|--------------|----------------------------------|-----------------------|----------------------|
|                                                                            | CTD                                 | LVO          | HTX         | Controls     | CTD                              | LVO          | HTX         | Controls     | CTD                              | LVO                   | HTX                  |
|                                                                            | 154<br>trios                        | 132<br>trios | 70<br>trios | 264<br>trios | 154<br>trios                     | 132<br>trios | 70<br>trios | 264<br>trios |                                  |                       |                      |
| Silent                                                                     | 9                                   | 7            | 3           | 21           | 0.06                             | 0.05         | 0.04        | 0.08         | N/A                              | N/A                   | N/A                  |
| Nonconserved Missense                                                      | 14                                  | 10           | 2           | 17           | 0.08                             | 0.08         | 0.03        | 0.06         | 1.92<br>(0.67 - 5.51)            | 1.76<br>(0.55 - 5.6)  | 0.82<br>(0.12 - 5.5) |
| Silent and All Protein Changing                                            | 42                                  | 46           | 11          | 53           | 0.27                             | 0.35         | 0.16        | 0.20         | N/A                              | N/A                   | N/A                  |
| All Protein Changing                                                       | 33                                  | 39           | 8           | 32           | 0.21                             | 0.30         | 0.11        | 0.12         | 2.41<br>(0.96 - 6.04)            | 3.66<br>(1.38 - 9.7)  | 1.75<br>(0.4 - 7.36) |
| Conserved Missense                                                         | 13                                  | 22           | 4           | 13           | 0.08                             | 0.17         | 0.06        | 0.05         | 2.33<br>(0.78 - 6.98)            | 5.08<br>(1.7 - 15.2)  | 2.15<br>(0.4 - 11.2) |
| Conserved and Damaging Protein Altering                                    | 20                                  | 29           | 6           | 15           | 0.13                             | 0.22         | 0.09        | 0.06         | 3.11<br>(1.11 - 8.7)             | 5.80<br>(2 - 16.7)    | 2.80<br>(0.6 - 13)   |
| Damaging                                                                   | 6                                   | 7            | 2           | 2            | 0.05                             | 0.05         | 0.03        | 0.01         | 7.00<br>(1.2 - 41.54)            | 10.50<br>(1.8 - 62.8) | 7.00<br>(0.7 - 70.1) |

  

| <b>b. Cases vs. controls,<br/>Low heart expressed<br/>genes (bottom 75%)</b> | Total # of <i>de novo</i> mutations |              |             |              | <i>De novo</i> mutations/subject |              |             |              | Odds Ratio (95% CI) <sup>†</sup> |                      |                       |
|------------------------------------------------------------------------------|-------------------------------------|--------------|-------------|--------------|----------------------------------|--------------|-------------|--------------|----------------------------------|----------------------|-----------------------|
|                                                                              | CTD                                 | LVO          | HTX         | Controls     | CTD                              | LVO          | HTX         | Controls     | CTD                              | LVO                  | HTX                   |
|                                                                              | 154<br>trios                        | 132<br>trios | 70<br>trios | 264<br>trios | 154<br>trios                     | 132<br>trios | 70<br>trios | 264<br>trios |                                  |                      |                       |
| Silent                                                                       | 15                                  | 20           | 9           | 39           | 0.10                             | 0.15         | 0.13        | 0.15         | N/A                              | N/A                  | N/A                   |
| Nonconserved Missense                                                        | 42                                  | 33           | 25          | 70           | 0.27                             | 0.25         | 0.36        | 0.27         | 1.56<br>(0.8 - 3.2)              | 0.92<br>(0.47 - 1.8) | 1.55<br>(0.66 - 3.65) |
| Silent and All Protein Changing                                              | 80                                  | 67           | 44          | 157          | 0.52                             | 0.51         | 0.63        | 0.59         | N/A                              | N/A                  | N/A                   |
| All Protein Changing                                                         | 65                                  | 47           | 35          | 118          | 0.42                             | 0.36         | 0.50        | 0.45         | 1.43<br>(0.7 - 2.79)             | 0.78<br>(0.4 - 1.47) | 1.29<br>(0.57 - 2.91) |
| Conserved Missense                                                           | 20                                  | 11           | 6           | 33           | 0.13                             | 0.08         | 0.09        | 0.13         | 1.58<br>(0.7 - 3.56)             | 0.65<br>(0.27 - 1.6) | 0.79<br>(0.25 - 2.44) |
| Conserved and Damaging Protein Altering                                      | 23                                  | 14           | 10          | 48           | 0.15                             | 0.11         | 0.14        | 0.18         | 1.25<br>(0.57 - 2.7)             | 0.57<br>(0.3 - 1.27) | 0.90<br>(0.33 - 2.44) |
| Damaging                                                                     | 3                                   | 3            | 4           | 15           | 0.02                             | 0.02         | 0.06        | 0.06         | 0.52<br>(0.1 - 2.06)             | 0.39<br>(0.1 - 1.51) | 1.16<br>(0.31 - 4.32) |

<sup>†</sup>The odds ratio is the ratio of protein-altering to silent variants in each disease class divided by the corresponding ratio in controls  
Abbreviations: CTD: Conotruncal defects, LVO: Left ventricular obstruction, HTX: Heterotaxy

**Table S10. Chromatin modifying and other genes of interest with *de novo* mutations in CHD probands**

| ID      | Gene            | Heart Exp <sup>†</sup> | Mutation          | Primary Classification: Specific Cardiovascular Diagnoses <sup>§</sup>                  | Extracardiac Structural Anomalies                                                                                                                                      | Neuro-Developmental    | Somatic Growth |       |
|---------|-----------------|------------------------|-------------------|-----------------------------------------------------------------------------------------|------------------------------------------------------------------------------------------------------------------------------------------------------------------------|------------------------|----------------|-------|
|         |                 |                        |                   |                                                                                         |                                                                                                                                                                        |                        | Ht(%)          | Wt(%) |
| 1-00596 | <i>MLL2</i>     | 216                    | p.Ser1722 Argfs*9 | LVO: Mitral atresia, HLHS, aortic atresia, dbl AA                                       | Epicanthal folds, telecanthus, large low-set ears, excess nuchal skin, high arched palate, wide-spaced nipples, undescended testes, club foot, hyperpigmented lesions, | motor delay, hypotonia | 50             | <5    |
| 1-00853 | <i>WDR5</i>     | 39                     | p.Lys7Gln         | CTD: TOF, right aortic arch, aberrant LSA, coronary abnormality                         | No                                                                                                                                                                     | abnormal               | 90             | 90    |
| 1-00534 | <i>CHD7</i>     | 125                    | p.Gln1599*        | CTD: TOF-PA                                                                             | Cleft lip, cleft palate, inguinal hernia, micropenis, sensorineural hearing loss                                                                                       | abnormal               | <5             | <5    |
| 1-00230 | <i>KDM5A</i>    | 70                     | p.Arg1508Trp      | LVO: LSVC, Primum ASD, cleft MV, sub-AS, BAV                                            | No                                                                                                                                                                     | normal                 | <5             | <5    |
| 1-01965 | <i>KDM5B</i>    | 68                     | p.IVS12+1 G>A     | LVO: Coarctation                                                                        | No                                                                                                                                                                     | n/a                    | <5             | <5    |
| 1-01907 | <i>UBE2B</i>    | 146                    | p.Arg8Thr         | CTD: TOF                                                                                | No                                                                                                                                                                     | normal                 | 50             | 10    |
| 1-00075 | <i>RNF20</i>    | 58                     | p.Gln83*          | HTX: Dextrocardia, RAI, TAPVR, L-ventricular loop, CAVC unbalanced-right dominant, PA   | Low-set ears, excess nuchal skin, hydronephrosis, wide-spaced 2nd toe, Asplenia, primary cilia dyskinesia                                                              | abnormal               | <5             | <5    |
| 1-01260 | <i>USP44</i>    | 0                      | p.Glu71Asp        | LVO: ASD, mitral atresia, aortic atresia, HLHS                                          | No                                                                                                                                                                     | normal                 | 25             | 25    |
| 1-02020 | <i>SMAD2</i>    | 38                     | p.IVS6+1 G>A      | HTX: Dextrocardia, ASD, CAVC-unbalanced, DORV, D-TGA, PS                                | Asplenia                                                                                                                                                               | normal                 | 95             | 10    |
| 1-02621 | <i>SMAD2</i>    | 38                     | p.Trp244Cys       | HTX: Dextrocardia, LSVC to LA, PAPVR, CAVC unbalanced-right dominant, DORV, PS          | Abnormal nose, foot syndactyly, malrotation                                                                                                                            | n/a                    | 50             | 50    |
| 1-01451 | <i>MED20</i>    | 25                     | p.IVS2+2 T>C      | HTX: Dextrocardia, PAPVR, mitral atresia, HLHS, aortic atresia, hypoplastic AA          | No                                                                                                                                                                     | abnormal               | <5             | 10    |
| 1-01151 | <i>SUV420H1</i> | 44                     | p.Arg143Cys       | CTD: dbl AA                                                                             | No                                                                                                                                                                     | abnormal               | 50             | 10    |
| 1-00750 | <i>HUWE1</i>    | 260                    | p.Arg3219Cys      | LVO: Mitral stenosis, aortic stenosis, HLHS                                             | No                                                                                                                                                                     | mild abnormal          | 25             | 25    |
| 1-00577 | <i>CUL3</i>     | 57                     | p.Iso144Phe fs*23 | LVO: Hypoplastic mitral valve, hypoplastic aortic annulus, aortic stenosis, coarctation | Congenital hip dysplasia, congenital scoliosis                                                                                                                         | n/a                    | 12             | 60    |
| 1-00116 | <i>NUB1</i>     | 45                     | p.Asp310His       | CTD: LSVC, sinus venosus ASD, truncus arteriosus, VSD-muscular                          | Spine lipoma                                                                                                                                                           | abnormal               | <5             | 5     |
| 1-01828 | <i>DAPK3</i>    | 55                     | p.Pro193Leu       | CTD: TOF                                                                                | No                                                                                                                                                                     | n/a                    | n/a            | n/a   |
| 1-03151 | <i>SUPT5H</i>   | 133                    | p.Glu451Asp       | LVO: BAV, aortic stenosis                                                               | No                                                                                                                                                                     | n/a                    | 75             | 90    |
| 1-00455 | <i>NAA15</i>    | 214                    | p.Lys335Lys fs*6  | HTX: Dextrocardia, TAPVR, LSVC, hypoplastic TV, DORV, hypoplastic RV, D-TGA, PS         | Hydronephrosis, asplenia, malrotation                                                                                                                                  | normal                 | 50             | 50    |
| 1-00141 | <i>NAA15</i>    | 214                    | p.Ser761*         | CTD: TOF, single LCA                                                                    | No                                                                                                                                                                     | n/a                    | <5             | 20    |
| 1-01138 | <i>USP34</i>    | 65                     | p.Leu432Pro       | LVO: supra MS, BAV, CoA                                                                 | No                                                                                                                                                                     | n/a                    | 25             | >95   |
| 1-00448 | <i>NF1</i>      | 55                     | p.IVS6+4 del A    | CTD: PA VSD-MAPCAs                                                                      | No                                                                                                                                                                     | n/a                    | 5              | 5     |
| 1-00802 | <i>PTCH1</i>    | 32                     | p.Arg831Gln       | LVO: HLHS                                                                               | No                                                                                                                                                                     | n/a                    | 50             | 50    |
| 1-02458 | <i>SOS1</i>     | 28                     | p.Thr266Lys       | Other: ASD (multiple), dysplastic mitral, tricuspid and pulmonic valves                 | Macrocephaly, dolichocephaly, low-set ears, hyperextensible fingers, foot syndactyly, café-au-lait spots                                                               | abnormal               | <5             | 5     |
| 1-02952 | <i>PITX2</i>    | 18                     | p.Ala47Val        | LVO: CoA                                                                                | No                                                                                                                                                                     | n/a                    | 75             | >95   |
| 1-01913 | <i>RAB10</i>    | 119                    | p.Asn112Ser       | Other: DILV, D-TGA, BAV, CoA                                                            | No                                                                                                                                                                     | n/a                    | 30             | 95    |

<sup>†</sup>Heart expression refers to # reads per million at murine e14.5. Mutation denotes the impact on encoded protein in three letter code; \* denotes termination mutation. *Frameshift* mutation in *MLL2*, *CUL3* and *NAA15*. 'IVS' stands for intervening sequence. 'fs' stands for frameshift. *Splice site* mutation in *KDM5B*, *MED20*, and *SMAD2* occur at 1st base of canonical splice donor of intron 12, at 2nd base of canonical splice donor of intron 2 and 1<sup>st</sup> base of canonical splice donor of intron 6 respectively.

<sup>§</sup>HLHS-hypoplastic left heart syndrome; Dbl AA-double aortic arch; TOF-tetralogy of Fallot; PAPVR-partial anomalous pulmonary venous return; LSVC-left superior vena cava; LA-left atrium; CAVC-complete atrioventricular canal defect; TAPVR- total anomalous pulmonary venous return; MV-mitral valve; BAV-bicuspid aortic valve; ASD-atrial septal defect; VSD- ventricular septal defect; PA-pulmonary atresia; RAI- right atrial isomerization.

**Table S11. Genes with > 1 de novo mutation in CHD probands**

| ID      | Gene          | Heart Exp <sup>†</sup> | Mutation         | Primary Classification: Specific Cardiovascular Diagnoses <sup>§</sup>                             | Extracardiac Anomalies                          | Neuro-Developmental Abnormal | Somatic Growth |       |
|---------|---------------|------------------------|------------------|----------------------------------------------------------------------------------------------------|-------------------------------------------------|------------------------------|----------------|-------|
|         |               |                        |                  |                                                                                                    |                                                 |                              | HT(%)          | Wt(%) |
| 1-00455 | <i>NAA15</i>  | 214                    | p.Lys335Lys fs*6 | HTX: Dextrocardia, TAPVR, LSVC, hypoplastic TV, DORV, hypoplastic RV, D-TGA, PS                    | Hydronephrosis, asplenia, malrotation           | Yes                          | 50             | 50    |
| 1-00141 | <i>NAA15</i>  | 214                    | p.Ser761*        | CTD: TOF, single LCA                                                                               | No                                              | n/a                          | <5             | 20    |
| 1-02020 | <i>SMAD2</i>  | 38                     | p.IVS6+1 G>A     | HTX: Dextrocardia, ASD, CAVC-unbalanced, DORV, D-TGA, PS                                           | Asplenia                                        | No                           | 95             | 10    |
| 1-02621 | <i>SMAD2</i>  | 38                     | p.Trp244Cys      | HTX: Dextrocardia, LSVC to LA, PAPVR, CAVC unbalanced-right dominant, DORV, PS                     | Abnormal nose, foot syndactyly, malrotation     | n/a                          | 50             | 50    |
| 1-02121 | <i>DST</i>    | 122                    | p.Gly2936Asp     | CTD: Right aortic arch-abn branching, vascular ring                                                | Absent right kidney, dysplastic left kidney     | Yes                          | <5             | <5    |
| 1-02394 | <i>DST</i>    | 122                    | p.Lys2653Ile     | LVO: Coarctation                                                                                   | No                                              | Yes                          | 75             | 50    |
| 1-01538 | <i>MKRN2</i>  | 19                     | p.Ala251Val      | HTX: Mesocardia, atrial situs inversus, VSD-malalignment, D-TGA, PA                                | Abdominal situs inversus                        | No                           | 50             | 50    |
| 1-00230 | <i>MKRN2</i>  | 19                     | p.Arg50Trp       | LVO: LSVC, primum ASD, cleft MV, sub-AS, BAV                                                       | No                                              | No                           | <5             | <5    |
| 1-01664 | <i>OBSCN</i>  | 298                    | p.Phe5295Ser     | HTX: Dextrocardia, LSVC, hypoplastic MV, sub AS, BAV, congenital coronary abnormality, coarctation | No                                              | n/a                          | 25             | 10    |
| 1-03190 | <i>OBSCN</i>  | 298                    | p.Thr4421Met     | CTD: TOF-PA with MAPCAs                                                                            | No                                              | No                           | 75             | 75    |
| 1-01341 | <i>UMODL1</i> | 0                      | p.Val1090Met     | CTD: TOF, ASD, LPA stenosis                                                                        | No                                              | No                           | n/a            | n/a   |
| 1-02408 | <i>UMODL1</i> | 0                      | p.Lys1251Glu     | HTX: Dextrocardia, mitral atresia, PA, L-TGA                                                       | Epicanthic folds, flat nasal bridge, short neck | No                           | 10             | 10    |

<sup>†</sup>Heart expression refers to # reads per million in murine hearts at e14.5. Mutation denotes the impact on encoded protein in single letter code; \* denotes termination mutation. 'IVS' stands for intervening sequence. 'fs' stands for frameshift. *Frameshift* mutation in *NAA15*. *Splice site mutation* in *SMAD2* occurs at 1st base of canonical splice donor of intron 6.

<sup>§</sup>LSVC-left superior vena cava; LA-left atrium; PAPVR-partial anomalous pulmonary venous return; CAVC-complete atrioventricular canal defect; TAPVR- total anomalous pulmonary venous return; ASD-atrial septal defect; DORV-double outlet right ventricle; D-TGA- dextro transposition of great arteries; PS-pulmonic stenosis; MV-mitral valve; BAV-bicuspid aortic valve; TOF-tetralogy of Fallot; LCA-left coronary artery, VSD- ventricular septal defect; LPA stenosis- late left pulmonary artery stenosis .

**Table S12. Candidate genes for LVO, CTD and HTX**

|          |          |         |          |          |          |          |
|----------|----------|---------|----------|----------|----------|----------|
| ACP6     | CCDC40   | FBN2    | IGFBP4   | MYH11    | PPP3CA   | SUPT3H   |
| ACTA2    | CCT4     | FGF8    | IGFBP5   | MYH6     | PQPB1    | TBX1     |
| ACTC1    | CDH2     | FGFR1   | IHH      | NEK2     | PRKAB2   | TBX20    |
| ACVR1    | CER1     | FIBP1   | INVERSIN | NF1      | PROX1    | TBX3     |
| ACVR2B   | CFC1     | FLNA    | IPPK     | NFATC1   | PTCH1    | TBX5     |
| AHSA2    | CHD1L    | FMO5    | ISL1     | NFATC3   | PTCH2    | TCF21    |
| AKAP9    | CHRA1    | FOXA2   | JAG1     | NFATC4   | PTPN11   | TDGF1    |
| ANKRD1   | CHRD     | FOXC1   | JAZF1    | NIPBL    | RAB10    | TFAP2B   |
| APOBEC2  | CITED2   | FOXH1   | KCNE1    | NKD1     | RAB23    | TGFBR2   |
| ARL13B   | CLDN7    | FOXJ1   | KCNJ2    | NKX2-5   | RAI1     | TLL1     |
| ASXL2    | CLUL1    | FOXL2   | KCNQ1    | NKX2-6   | RAI2     | TMBIM4   |
| ATE1     | CREBBP   | FTO     | KIAA1841 | NKX2.5   | RAPGEF5  | TMEM195  |
| ATP1A2   | CRELD1   | GADL1   | KIF3A    | NKX3-2   | REL      | TNFRSF21 |
| ATP4A    | CRHBP    | GALNT11 | KIF3B    | NODAL    | RFX2     | TSC1     |
| ATP4B    | CRX      | GATA4   | KIF3C    | NOTCH1   | RFX3     | TSEN15   |
| BBS1     | CSRP1    | GATA5   | KIFAP3   | NOTCH2   | ROCK2    | TTC21B   |
| BBS10    | CTNNA3   | GATA6   | KLF13    | NOTCH2NL | ROR2     | TTC30A   |
| BBS11    | DAND5    | GDF1    | LBR      | NOTCH3   | ROTATIN  | TWIST1   |
| BBS12    | DHCR7    | GJA1    | LEFTY1   | NOTCH4   | RPGRIP1L | TXNDC3   |
| BBS2     | DLL1     | GJA5    | LEFTY2   | NOTO     | RUNX2    | UBR1     |
| BBS3     | DMRT2    | GJA8    | LEMD3    | NPHP3    | S100Z    | USP34    |
| BBS4     | DNAH2    | GJA9    | LLPH     | NPPA     | SALL1    | VANGL2   |
| BBS5     | DNAH5    | GPC3    | LPIN1    | NSD1     | SALL4    | VEGFA    |
| BBS6     | DNAI1    | GPR161  | LRP2     | NUMBL    | SDC2     | VEGFC    |
| BBS7     | DNAI2    | GPRC6A  | LRRC50   | NUP188   | SEMA3E   | VIT      |
| BBS8     | DOLK     | GSK3B   | LRRC6    | OFD1     | SESN1    | WNT3A    |
| BBS9     | DPPA4    | HAND1   | MARK2    | OSR1     | SHH      | XPO1     |
| BCL11A   | DQ983818 | HAND2   | MAX      | PAPOLG   | SHOC2    | ZAC1     |
| BCL6     | DVL1     | HES1    | MED13L   | PCMTD2   | SIL      | ZEB2     |
| BCL9     | DVL2     | HES4    | MEF2A    | PCNT     | SLC2A10  | ZFPM1    |
| BCOR     | DZIP1    | HEY2    | MEF2C    | PCSK5    | SMAD2    | ZIC3     |
| BICC1    | EED      | HOXA1   | METT10D  | PEX1     | SMAD5    | ZNF480   |
| BMP4     | EHMT1    | ID2     | MGAT1    | PEX13    | SMARCD3  | ZNF528   |
| BMP7     | ELN      | IER2    | MGP      | PHYHD1   | SMO      | ZNF534   |
| BMPR1A   | EP300    | IFT122  | MID1     | PIFO     | SNAI1    | ZNF610   |
| BMPR1B   | ESCO2    | IFT172  | MKKS     | PITX2    | SOS1     | ZNF638   |
| BMPR2    | EVC      | IFT20   | MKS1     | PKD1L1   | SOX17    | ZNHIT3   |
| BUB1B    | EVC2     | IFT57   | MNDA     | PKD2     | SRF      |          |
| C1orf106 | EZH1     | IFT88   | MSX1     | PLAGL1   | STIL     |          |
| CCDC39   | FBN1     | MYH10   | MSX2     | PPM1K    | SUFU     |          |



**Table S13. *De novo* mutations in CHD cohort that occur in candidate gene set**

| CHD Cohort | Gene  | AA Change        |
|------------|-------|------------------|
| 1-00638    | FBN2  | p.Asp2191Asn     |
| 1-00596    | MLL2  | p.Ser1722Argfs*9 |
| 1-00534    | CHD7  | p.Gln1599*       |
| 1-01913    | RAB10 | p.Asn112Ser      |
| 1-00197    | BCL9  | p.Met1395Lys     |
| 1-01138    | USP34 | p.Leu432Pro      |
| 1-00448    | NF1   | p.IVS6+4 delA    |
| 1-02020    | SMAD2 | p.IVS6+1 G>A     |
| 1-02621    | SMAD2 | p.Trp224Cys      |
| 1-00802    | PTCH1 | p.Arg831Gln      |
| 1-02458    | SOS1  | p.Thr266Lys      |
| 1-02952    | PITX2 | p.Ala47Val       |
| 1-02598    | LRP2  | p.Glu4372Lys     |

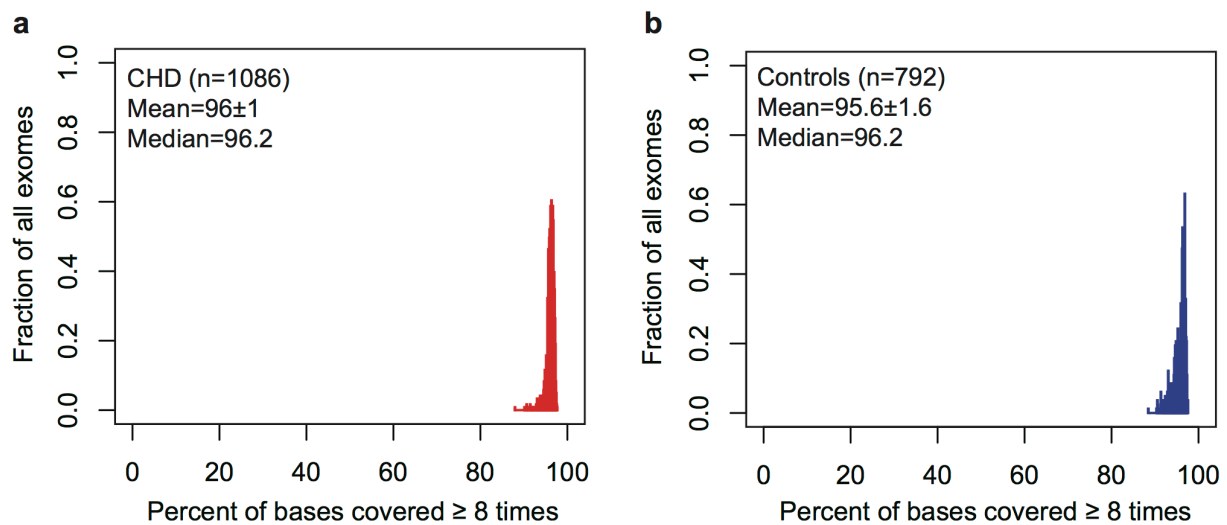

**Figure S1. Distribution of 8X read coverage between cases and controls.** Percent of bases covered  $\geq 8$  times plotted for CHD cases (a) and controls (b). Distribution, mean and median are highly concordant.

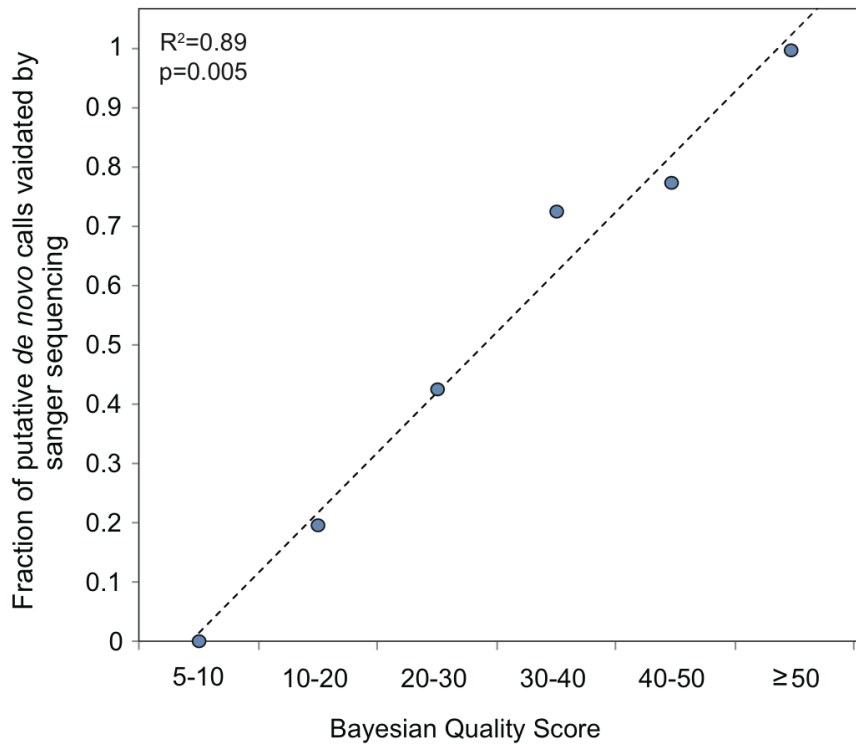

**Figure S2. Correlation of Bayesian quality score and probability of Sanger validation.** A strong correlation between the fraction of putative *de novo* variants and specific ranges of Bayesian quality scores,  $R^2=0.89$ . Notably, Sanger sequencing validated a subset (88) of all *de novo* calls with a Bayesian quality score  $\geq 50$ , with a specificity of 100%.

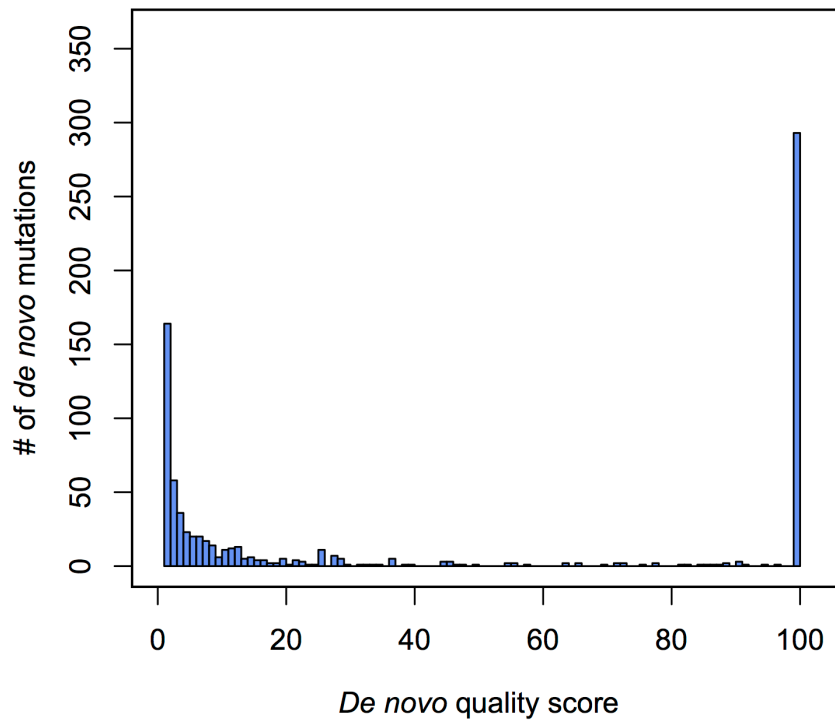

**Figure S3. Distribution of *de novo* mutation quality scores.** The frequency of potential *de novo* mutations in different bins of *de novo* quality scores are shown. 100% of variants with scores  $\geq 50$  confirmed as *de novo* mutations by Sanger sequencing. Of these, ~90% had the maximum QS of 100. (see Supplementary Table 3 and Supplementary Figure 2).

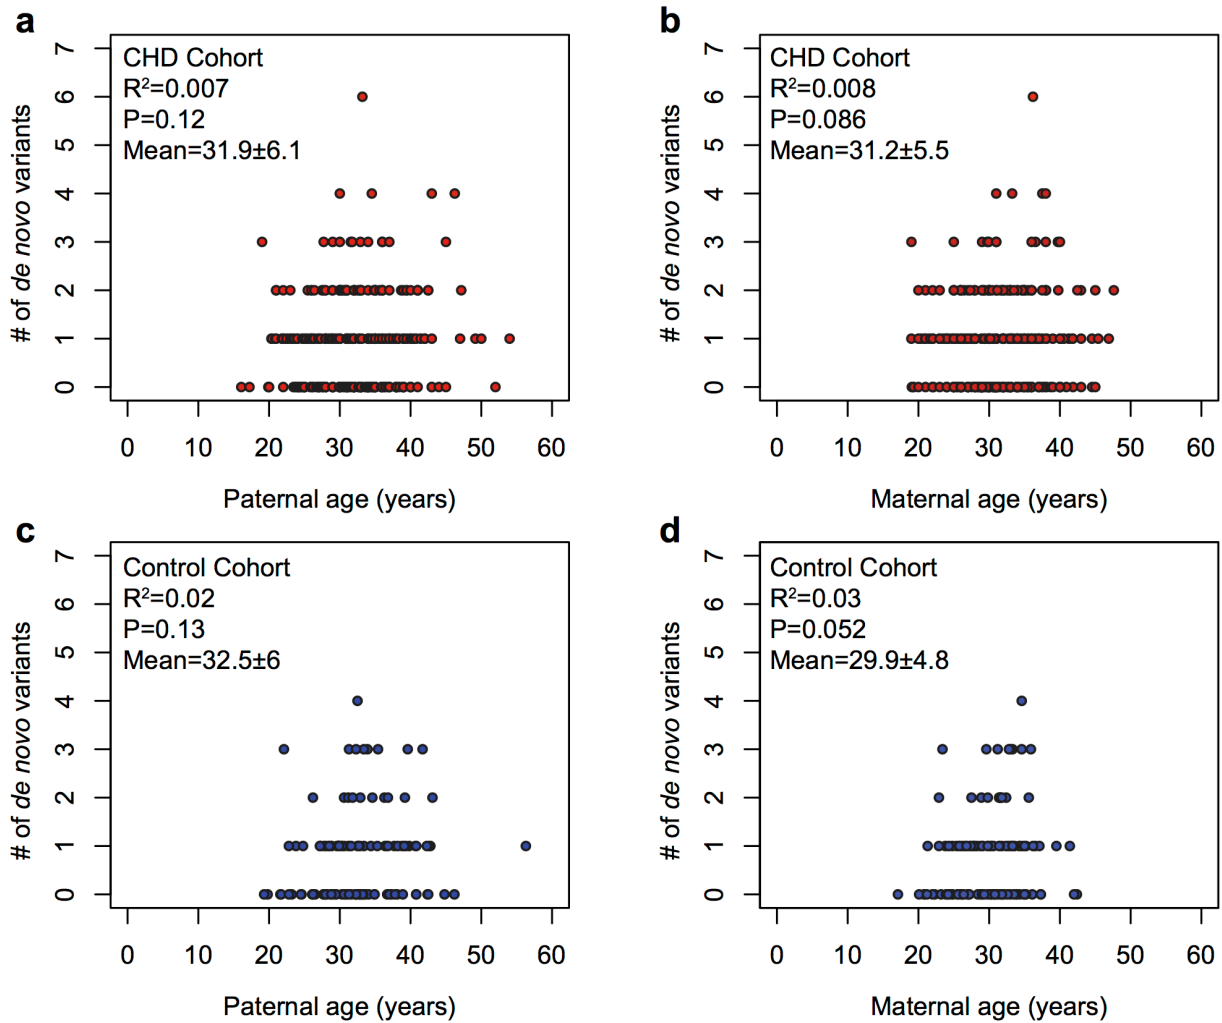

**Figure S4. Correlation of paternal and maternal age with *de novo* mutation rate.** Weak correlation between paternal (a,c) or maternal (b,d) age and number of *de novo* mutations per subject in the CHD (a,b) or control (c,d) cohorts.

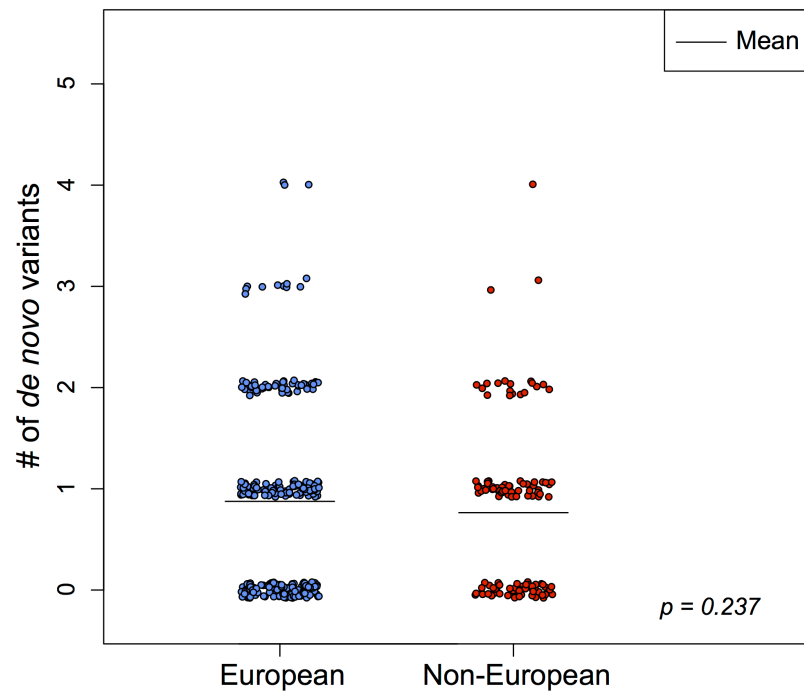

**Figure S5. Effect of ancestry on *de novo* mutation rate.** No significant difference in *de novo* mutation rate between European and Non-European (Indian, Mexican, African-American, and East Asian) ancestries,  $p=0.24$ .

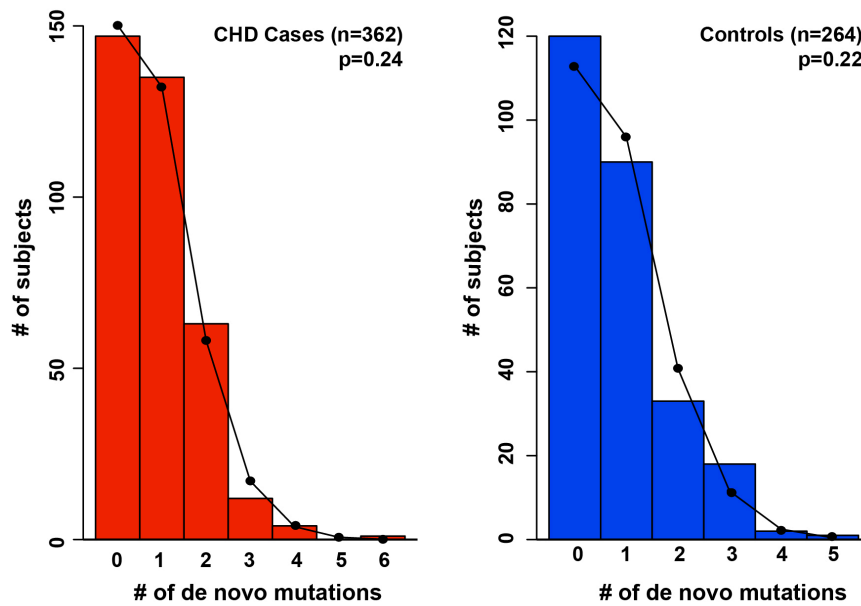

**Figure S6. *De novo* mutation rate closely approximates Poisson distribution in CHD cases and controls.** Observed number of *de novo* mutations per subject (bars) compared to the numbers expected (line) from the Poisson distribution in CHD (red) and control (blue) cohorts. ‘p’ denotes Chi-squared value.

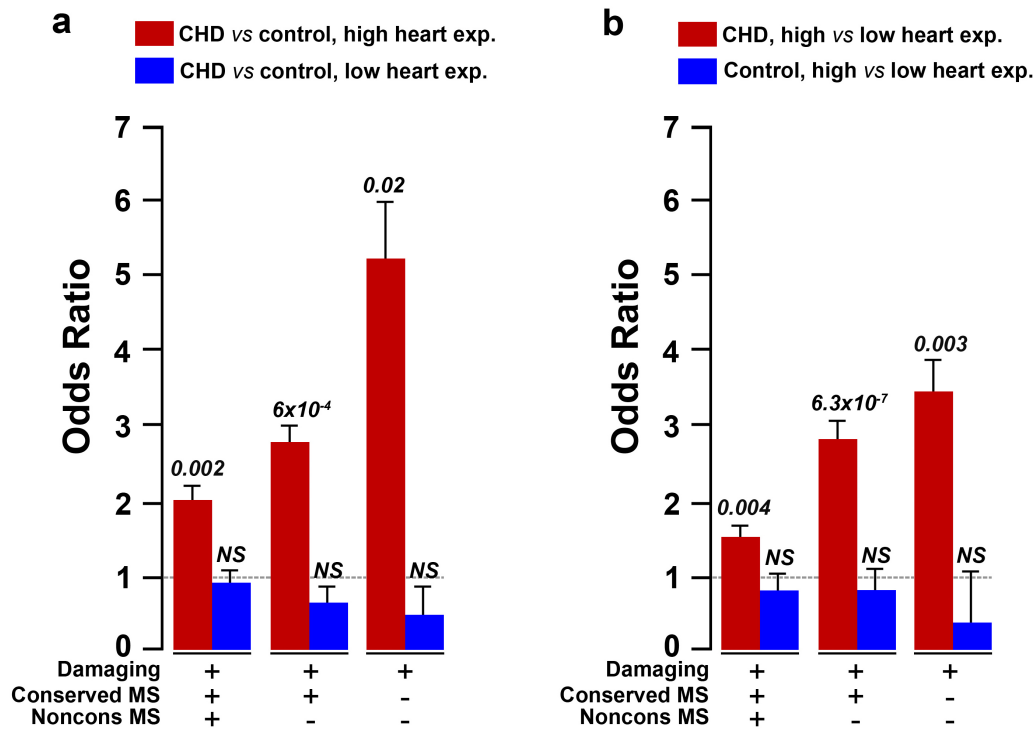

**Figure S7. *De novo* mutations in CHD probands and controls stratified for gene expression in developing heart; categorical analysis of the presence or absence of any *de novo* mutation in probands a**, Odds ratios (ORs) comparing fraction of patients with and without *de novo* mutations of indicated classes in CHD cases and controls for genes in top quartile (red bars) and bottom 75% (blue bars) of expression in developing heart. **b**, ORs comparing the presence of *de novo* mutations in genes in top quartile versus bottom 75% of expression in developing heart in CHD cases (red bars) and controls (blue bars). *De novo* mutations are classified as missense mutations at poorly conserved positions (noncons MS), missense mutations at highly conserved positions (cons MS), and damaging (nonsense, splice site, or frameshift mutations). Odds ratio + SEM is shown and significance of the difference between groups is indicated (*P* values from two-tailed Fisher exact test). Odds ratio compares the proportion of # of individuals with *de novo* mutations to the # of individuals without a *de novo* mutation in each specific category. NS, not significant.



**Mouse heart e14.5**

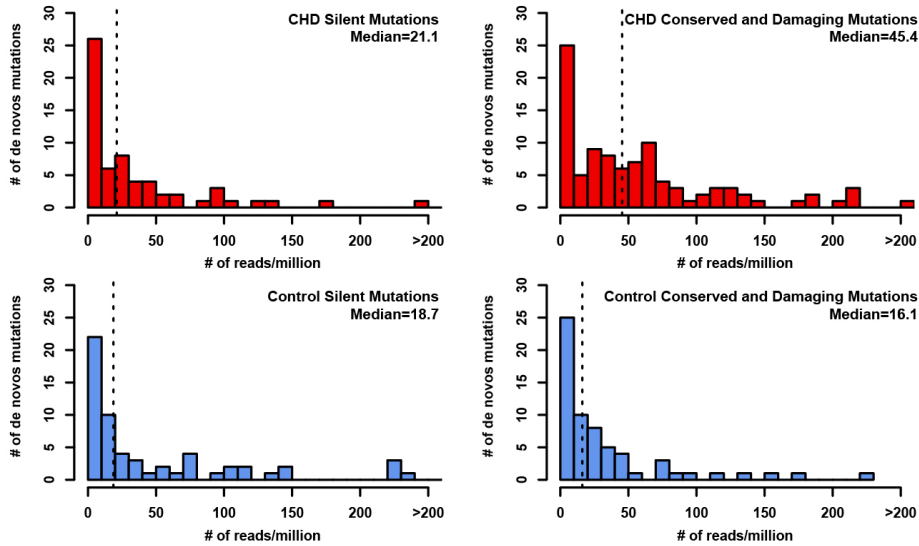

**Mouse heart e9.5**

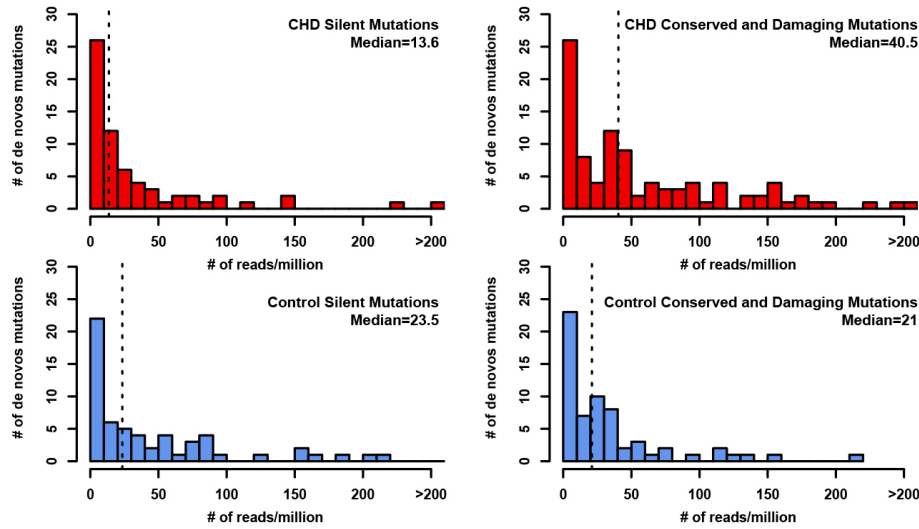

**Figure S8. Expression of genes mutated in cases and controls.** Expression levels (# of reads per million at e14.5 and e9.5) are shown for silent (a,c) and damaging and conserved (b,d) *de novo* mutations for cases (a,b) and controls (c,d). Vertical dashed lines indicate median values in each category. Conserved and damaging *de novo* mutations show higher expression in CHD cases than controls ( $P=5 \times 10^{-4}$  at e14.5 and  $P=1.6 \times 10^{-3}$  at e9.5), while silent mutations show no significant difference ( $P=0.7$  at e14.5 and  $P=0.5$  at e9.5) (comparison via Wilcoxon signed-ranked test).

■ CHD vs. control, high tissue exp.  
■ CHD vs. control, low tissue exp.

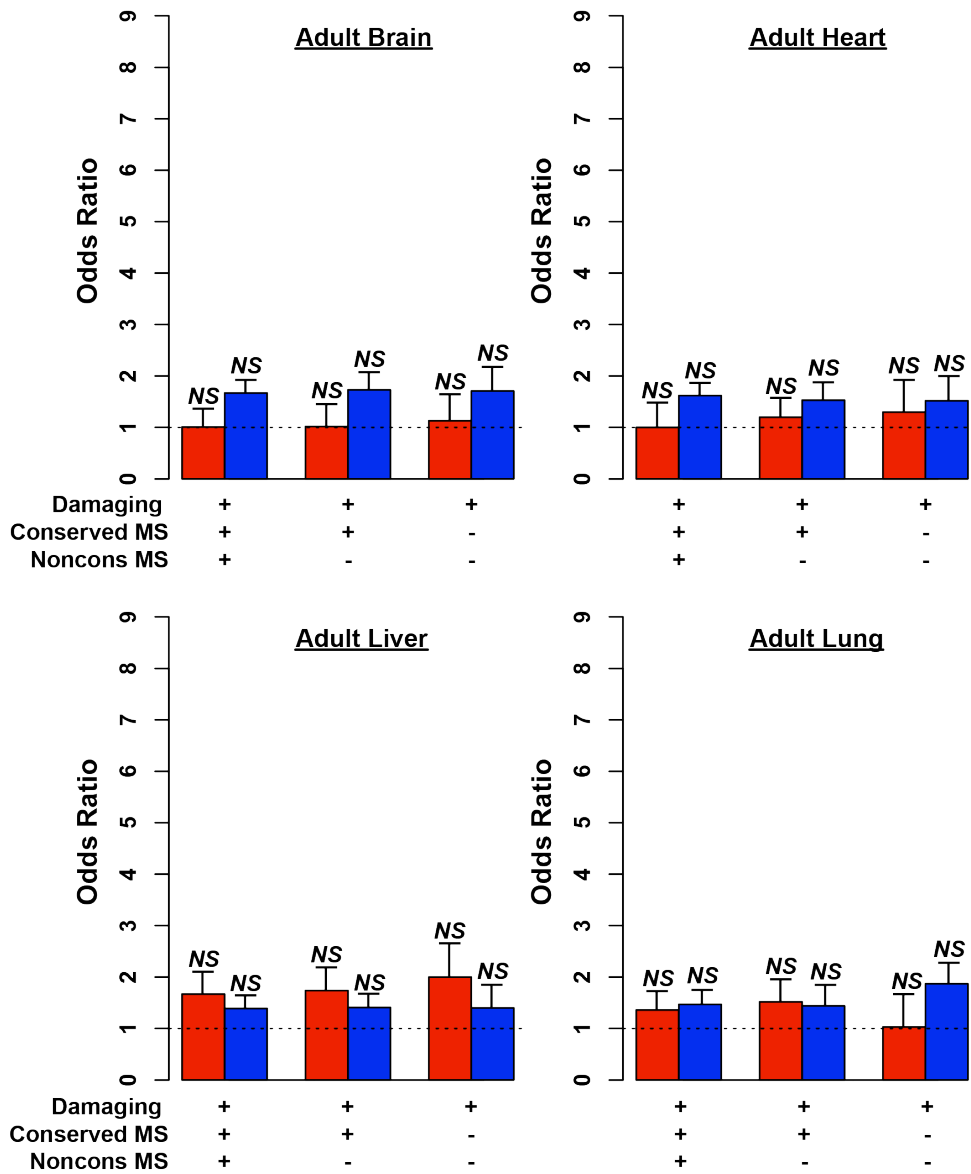

**Figure S9. *De novo* mutations in CHD cases and controls stratified for gene expression in adult tissues.** Odds ratios (ORs) comparing incidence of indicated classes of *de novo* mutations in CHD cases and controls for genes in top quartile (red bars) and bottom 75% (blue bars) of expression in different adult tissues. Odds ratio + SEM is shown and significance of the difference between groups is indicated (*P* values calculated from two-tailed binomial exact test). The odds ratio is the ratio of protein altering to silent variants in cases divided by the corresponding ratio in controls. NS, not significant.
